# Supplementary material for: Emotional and Behavioral Consequences of the COVID-19 Pandemic: The Role of Health Anxiety, Intolerance of Uncertainty, and Distress (In)Tolerance
Source: PubMed Central journal article supplement (PMC7578938; doi:10.3390/ijerph17197241), 2020-10-03
Supplement: ijerph-17-07241-s001.pdf [file ijerph-17-07241-s001.pdf]

## Supplementary material

**Table S1.** Results of the correlational analyses on age (1), sex (2), education (3), profession (4; students vs. others), physical disease (6), immunosuppressive medication (7), mental disorder (8), health anxiety (SHAI) pre (9) and during COVID-19 (10), reassurance, avoidance, and preventive behavior during COVID-19 (11–16), and anxiety in relation to SARS-CoV-2 (17–20) and to other diseases (21–23).

|    | 1                                    | 2       | 3      | 4       | 5       | 6      | 7      | 8      | 9      | 10     | 11     | 12     | 13     | 14     | 15     | 16     | 17     | 18     | 19     | 20     | 21     | 22     | 23     |   |
|----|--------------------------------------|---------|--------|---------|---------|--------|--------|--------|--------|--------|--------|--------|--------|--------|--------|--------|--------|--------|--------|--------|--------|--------|--------|---|
| 1  | Age                                  | 1       |        |         |         |        |        |        |        |        |        |        |        |        |        |        |        |        |        |        |        |        |        |   |
| 2  | Sex                                  | 0.13**  | 1      |         |         |        |        |        |        |        |        |        |        |        |        |        |        |        |        |        |        |        |        |   |
| 3  | Education <sup>a</sup>               | 0.07 *  | 0.10*  | 1       |         |        |        |        |        |        |        |        |        |        |        |        |        |        |        |        |        |        |        |   |
| 4  | Profession: student vs. others       | -0.72** | 0.15** | 0.49**  | 1       |        |        |        |        |        |        |        |        |        |        |        |        |        |        |        |        |        |        |   |
| 5  | Physical disease <sup>b</sup>        | 0.25**  | 0.05   | 0.22**  | -0.18** | 1      |        |        |        |        |        |        |        |        |        |        |        |        |        |        |        |        |        |   |
| 6  | Medication <sup>b</sup>              | 0.10**  | 0.02   | 0.17**  | -0.13** | 0.30** | 1      |        |        |        |        |        |        |        |        |        |        |        |        |        |        |        |        |   |
| 7  | Mental disorder <sup>b</sup>         | -0.02   | 0.11 * | 0.11*   | -0.03   | 0.07*  | -0.002 | 1      |        |        |        |        |        |        |        |        |        |        |        |        |        |        |        |   |
| 8  | HA pre                               | -0.09** | 0.34 * | -0.001  | 0.30    | 0.37** | 0.37*  | 0.48** | 1      |        |        |        |        |        |        |        |        |        |        |        |        |        |        |   |
| 9  | HA during                            | -0.06   | 0.29   | -0.05   | 0.33    | 0.35*  | 0.41** | 0.49** | 0.79** | 1      |        |        |        |        |        |        |        |        |        |        |        |        |        |   |
| 10 | Reassurance SARS-CoV-2 <sup>c</sup>  | 0.10**  | 0.12   | -0.06   | 0.19    | 0.17   | 0.16   | 0.19*  | 0.31** | 0.48** | 1      |        |        |        |        |        |        |        |        |        |        |        |        |   |
| 11 | Reassurance disease <sup>c</sup>     | 0.10**  | 0.16   | -0.13** | 0.20*   | 0.18   | 0.23*  | 0.24** | 0.43** | 0.49** | 0.61** | 1      |        |        |        |        |        |        |        |        |        |        |        |   |
| 12 | Avoidance SARS-CoV-2 <sup>c</sup>    | -0.01   | 0.18*  | -0.05   | 0.13    | 0.15   | 0.18   | 0.22*  | 0.16** | 0.20** | 0.12** | 0.22** | 1      |        |        |        |        |        |        |        |        |        |        |   |
| 13 | Avoidance disease <sup>c</sup>       | 0.23**  | 0.15   | -0.07   | 0.25**  | 0.17   | 0.14   | 0.22*  | 0.19** | 0.27** | 0.30** | 0.35** | 0.71** | 1      |        |        |        |        |        |        |        |        |        |   |
| 14 | Preventive SARS-CoV-2 <sup>c</sup>   | 0.08 *  | 0.21** | -0.09*  | 0.18*   | 0.15   | 0.15   | 0.12   | 0.18** | 0.36** | 0.48** | 0.32** | 0.05   | 0.20** | 1      |        |        |        |        |        |        |        |        |   |
| 15 | Preventive disease <sup>c</sup>      | 0.06    | 0.13   | -0.11** | 0.15    | 0.19*  | 0.18*  | 0.12   | 0.16** | 0.24** | 0.36** | 0.42** | 0.14** | 0.21** | 0.45** | 1      |        |        |        |        |        |        |        |   |
| 16 | Anxiety SARS-Cov-2 Dec <sup>d</sup>  | 0.01    | 0.20   | -0.11** | 0.21    | 0.32*  | 0.41** | 0.23   | 0.12** | 0.20** | 0.17** | 0.17** | 0.04   | 0.10** | 0.19** | 0.15** | 1      |        |        |        |        |        |        |   |
| 17 | Anxiety SARS-CoV-2 Jan <sup>d</sup>  | -0.03   | 0.29   | -0.10** | 0.30    | 0.32   | 0.40** | 0.29   | 0.17** | 0.26** | 0.21** | 0.21** | 0.06   | 0.10** | 0.19** | 0.20** | 0.65** | 1      |        |        |        |        |        |   |
| 18 | Anxiety SARS-CoV-2 Mar <sup>d</sup>  | -0.12** | 0.29   | -0.08*  | 0.39*   | 0.34   | 0.38*  | 0.37*  | 0.34*  | 0.53** | 0.38** | 0.27** | 0.10** | 0.14** | 0.39** | 0.16** | 0.29** | 0.41** | 1      |        |        |        |        |   |
| 19 | Anxiety SARS-CoV-2 week <sup>d</sup> | -0.06   | 0.30   | -0.03   | 0.31    | 0.33   | 0.37*  | 0.40*  | 0.31** | 0.54** | 0.43** | 0.30** | 0.06   | 0.14** | 0.42** | 0.24** | 0.29** | 0.39** | 0.76** | 1      |        |        |        |   |
| 20 | Anxiety disease Dec <sup>d</sup>     | 0.05    | 0.30   | -0.04   | 0.30    | 0.37*  | 0.40** | 0.39** | 0.44** | 0.40** | 0.24** | 0.31** | 0.11** | 0.18** | 0.16** | 0.15** | 0.34** | 0.38** | 0.29** | 0.31** | 1      |        |        |   |
| 21 | Anxiety disease Jan <sup>d</sup>     | 0.06    | 0.36*  | -0.06   | 0.30    | 0.37*  | 0.43** | 0.42** | 0.45** | 0.42** | 0.23** | 0.32** | 0.11** | 0.20** | 0.16** | 0.16** | 0.33** | 0.40** | 0.32** | 0.35** | 0.91** | 1      |        |   |
| 22 | Anxiety disease Mar <sup>d</sup>     | 0.07    | 0.30   | -0.03   | 0.29    | 0.35*  | 0.35*  | 0.37*  | 0.46** | 0.45** | 0.26** | 0.34** | 0.13** | 0.22** | 0.18** | 0.18** | 0.31** | 0.38** | 0.34** | 0.35** | 0.89** | 0.89** | 1      |   |
| 23 | Anxiety disease week <sup>d</sup>    | 0.08*   | 0.33   | -0.03   | 0.27    | 0.38*  | 0.38*  | 0.38*  | 0.45** | 0.45** | 0.26** | 0.35** | 0.14** | 0.17** | 0.18** | 0.21** | 0.31** | 0.38** | 0.30** | 0.35** | 0.85** | 0.88** | 0.92** | 1 |

Profession, physical disease, medication and mental disorder were treated as dichotomous variables, sex as a categorical variable, education, health anxiety, all behavior-related variables and anxiety in relation to SARS-CoV-2 and to other diseases as ordinal variables and age as a metric variable. Phi Coefficients were calculated for correlations between dichotomous variables, Cramer's  $v$  for correlations between dichotomous and categorical variables, Spearman's correlations for correlations between ordinal or ordinal and metric variables and point-biserial correlations for correlations between metric and dichotomous/categorical variables. SHAI = Short Health Anxiety Inventory. <sup>a</sup> Education: 0 = no formal education, 1 = primary school or basic school leaving qualification, 2 = secondary school certificate, 3 = advanced technical college certificate, 4 = higher education entrance qualification, 5 = university degree. <sup>b</sup> 1 = yes, 0 = no. <sup>c</sup> during COVID-19 behavior. <sup>d</sup> Anxiety related to SARS-CoV-2 and other severe diseases in December (Dec) 2019, January (Jan) 2020 and March (Mar) 2020 were retrospectively assessed.

\*\*  $p < 0.01$ , \*  $p < 0.05$
